# Supplementary material for: Transmembrane protein TMEM170A is a newly discovered regulator of ER and nuclear envelope morphogenesis in human cells
Source: Oxford University Press journal article supplement (doi:10.1242/jcs.175273), 2016-02-19
Supplement: jcs175273supp.pdf [file jcs175273supp.pdf]

SUPPLEMENTARY FIGURES

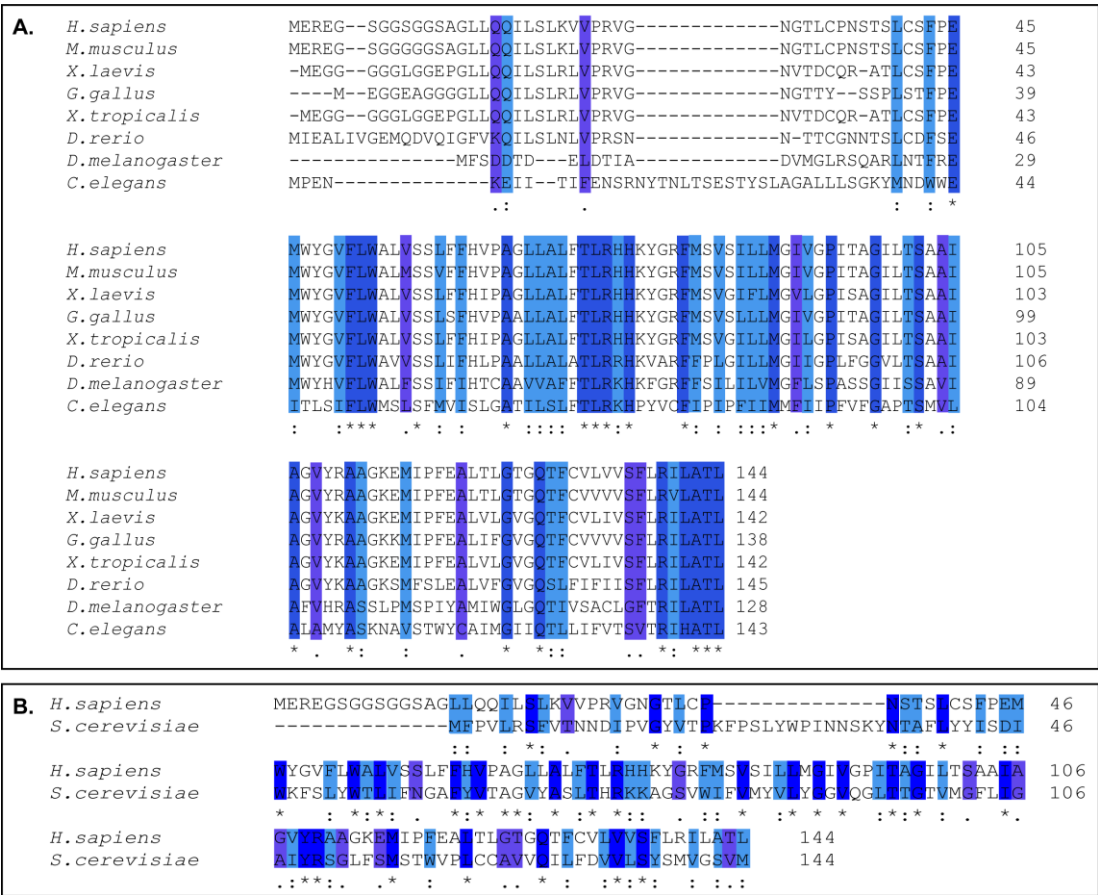

Fig. S1. TMEM170A is conserved in major eukaryotic phyla.

(A) Multiple sequence alignment of TMEM170A homologues from representative species.

(B) Sequence alignment of human TMEM170A and *S.cerevisiae* TMEM170A. The alignment was generated with Clustal Omega. Fully conserved amino acids were highlighted in dark blue and indicated by a star (\*) at the bottom, amino acids with strongly similar properties highlighted in light blue and indicated by a colon (:), and those with weakly similar properties with purple and indicated by a period (.). The following species and protein accession numbers from UniProtKB/Swiss-Prot database were used: Q8WVE7 (*Homo sapiens*); Q9D342 (*Mus musculus*); Q6DF87 (*Xenopus laevis*); F1N8V4 (*Gallus gallus*); A9ULP1 (*Xenopus tropicalis*); A3KPL7 (*Danio rerio*); Q7JV61 (*Drosophila melanogaster*); Q95QG3 (*Caenorhabditis elegans*); YPR153W (*Saccharomyces cerevisiae*).

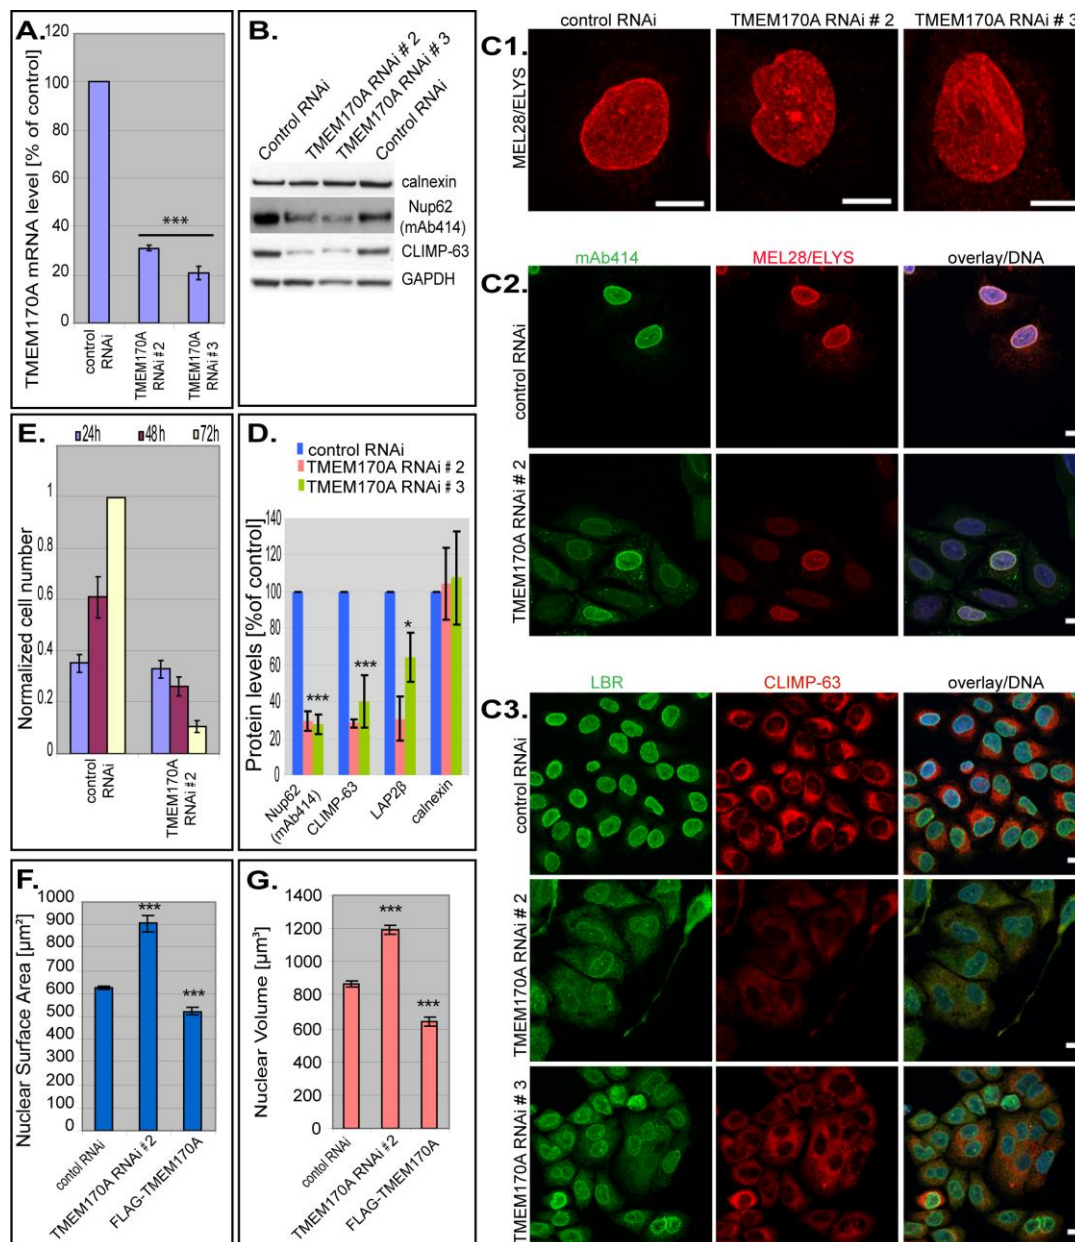

**Fig. S2.**

**(A) Establishing the conditions for TMEM170A silencing.**

Quantitative real-time PCR was used to measure mRNA levels of TMEM170A in TMEM170A silencing experiments using two different siRNA oligos (Table S3).

With siRNA oligo set #2, TMEM170A mRNA was reduced to  $31.0 \pm 1.3\%$  (s.d.) of control-silenced levels where as with siRNA oligo set #3 TMEM170A mRNA was reduced to  $20.6 \pm 2.7\%$  (s.d.) of control-silenced levels. mRNA levels of the *MGB2* housekeeping gene were used for sample normalization. n=3 independent experiments. Oligo set #2 was employed for further analysis. The \*\*\* indicate that the difference is extremely significant ( $P < 0.001$ ).

**(B)** TMEM170A siRNA (oligo set #2 or oligo set #3) reduces protein levels of CLIMP-63 and nucleoporin Nup62 while levels of calnexin were unaffected in HeLa K total cell protein extracts from control and TMEM170A-silenced cells, as assayed by Western blot.

**(C1-C2)** siRNA knock-down of TMEM170A with siRNA oligo set #2 or oligo set #3 reduced nuclear rim signal in HeLa K cells. HeLa K cells were transfected with negative control or

TMEM170A siRNAs (oligo set #2 or oligo set #3) and 72 or 48 hr (respectively) post transfection and cells were fixed and stained with mAb414 (green), MEL-28/ELYS (red) antibodies. Nuclei are counterstained with Hoechst (blue). Scale bars: 10  $\mu$ m.

**(C3)** TMEM170A-silenced cells with siRNA oligo set #2 or oligo set #3 were stained with CLIMP-63 antibody (red) and LBR (green). LBR (green) is strongly mislocalized to the ER in TMEM170A-silenced cells, compared to control cells, while silenced cells, stained with CLIMP-63 antibody (red), showed a reduced ER sheet signal, relative to controls. Nuclei were counterstained with Hoechst (blue). Scale bars: 10  $\mu$ m.

**(D)** Quantitation by Western blot of Nup62, CLIMP-63, LAP2 $\beta$  and calnexin protein levels in control, TMEM170 RNAi #2-silenced and TMEM170 RNAi #3-silenced samples. GAPDH in the same sample was used as a loading control for sample normalization. Results are shown as average normalized value of each protein level as a percentage of the control value (set at 100%; n=3 independent Western blots). The \*\*\* and \* indicate that the difference is extremely significant ( $P < 0.001$ ) and significant ( $P < 0.05$ ), respectively.

Results show a significant reduction of Nup62 (mAb414) protein levels in TMEM170 RNAi #2-silenced [to  $29.49 \pm 5.24$  of control ( $P = 0.0009$ , Student's t-test)] and TMEM170 RNAi #3-silenced [to  $27.62 \pm 5.74$  of control ( $P = 0.0005$ , Student's t-test)] samples. Results also show a significant reduction of CLIMP-63 protein levels in TMEM170 RNAi #2-silenced [to  $28.47 \pm 2.25$  of control ( $P = 6.89 \times 10^{-5}$ , Student's t-test)] and TMEM170 RNAi #3-silenced [to  $40.18 \pm 13.91$  of control ( $P = 0.0008$ , Student's t-test)] samples. Finally, LAP2 $\beta$  protein levels are also reduced in TMEM170 RNAi #2-silenced [to  $30.73 \pm 12.42$  of control ( $P = 0.02$ , Student's t-test)] and TMEM170 RNAi #3-silenced to [ $62.42 \pm 25.44$  of control ( $P = 0.04$ , Student's t-test)] samples. Protein levels of calnexin were not reduced upon TMEM170A silencing.

**(E) Down regulation of TMEM170A by siRNA causes cell death.**

HeLa K cells were transfected with control or TMEM170A siRNA (oligo set #2) and cells were counted after 24 hr, 48 hr and 72 hr. Cell numbers were normalized to 72 hr control siRNA cell numbers. Average of three independent experiments, for each time-point. Error bars show S.D.

**(F)** Quantitation of nuclear surface area of control-silenced cells, TMEM170A-silenced cells or transiently transfected with FLAG-TMEM170A HeLa K cells, n=52 cells per condition from three independent experiments. Error bars show S.D. The \*\*\* indicate that the difference is extremely significant ( $P < 0.001$ ).

TMEM170A-silenced cells showed an increase of their nuclear surface area to  $145.68 \pm 4.82\%$  compared to control cells [ $622.21 \pm 6.87 \mu\text{m}^2$  in controls vs.  $906.58 \pm 36.52 \mu\text{m}^2$  in silenced cells ( $P = 0.00019$ , Student's t-test)] whereas FLAG-TMEM170A transfected cells showed a reduction of nuclear surface area to  $83.9 \pm 1.9\%$  of control cells to control cells [ $622.21 \pm 6.87 \mu\text{m}^2$  in controls vs.  $522.14 \pm 15.88 \mu\text{m}^2$  in silenced cells ( $P = 0.0005$ , Student's t-test)].

**(G)** Quantitation of nuclear volume of control-silenced cells, TMEM170A-silenced cells or transiently transfected with FLAG-TMEM170A HeLa K cells, n=52 cells per condition from three independent experiments. Error bars show S.D. The \*\*\* indicate that the difference is extremely significant ( $P < 0.001$ ).

TMEM170A-silenced cells showed an increase of their nuclear volume to  $137.38 \pm 1.13\%$  of control cells [ $867.91 \pm 16.51 \mu\text{m}^3$  in controls vs.  $1192.4 \pm 28.39 \mu\text{m}^3$  in silenced cells ( $P = 6.84 \times 10^{-5}$ , Student's t-test)] whereas FLAG-TMEM170A transfected cells showed a reduction of nuclear volume to  $73.97 \pm 19.82\%$  control cells [ $867.91 \pm 16.51 \mu\text{m}^3$  in controls vs.  $643.31 \pm 25.47 \mu\text{m}^3$  in FLAG-TMEM170A overexpressing cells ( $P = 0.0002$ , Student's t-test)].

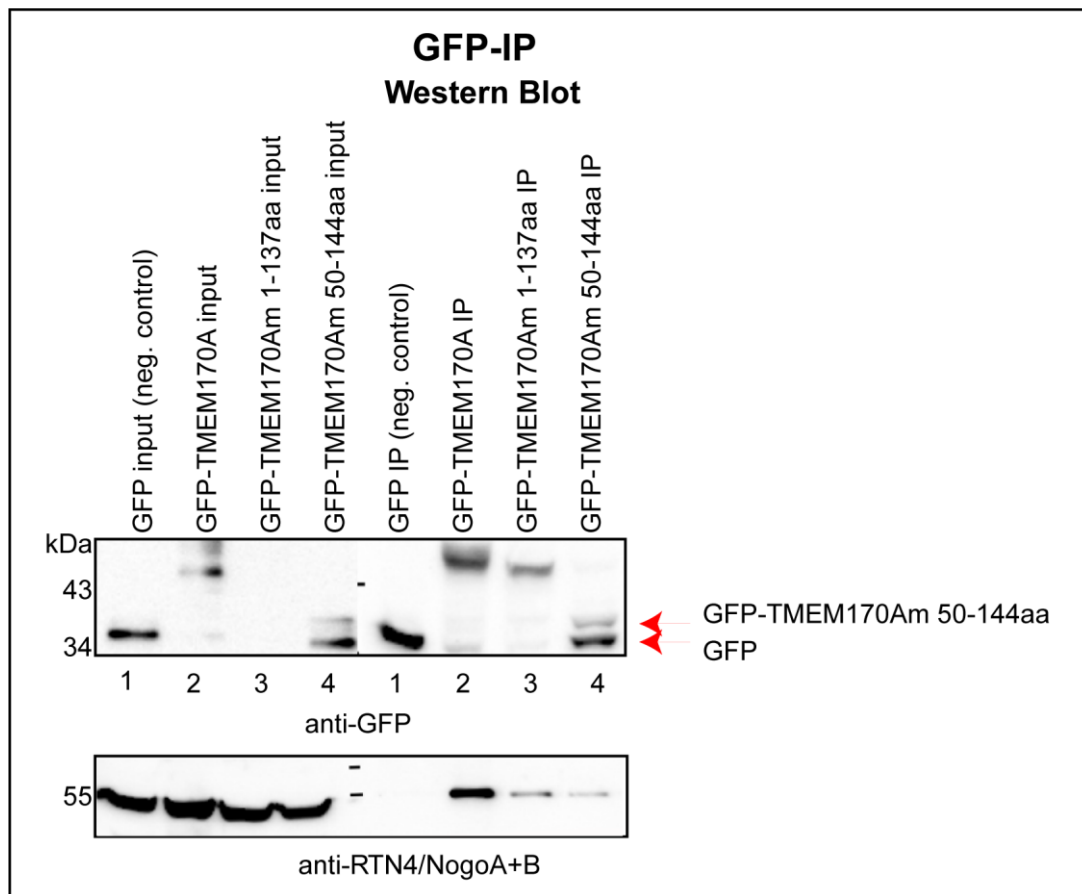

**Fig. S3. Western blot analysis indicating that the N- and C-termini of TMEM170A are not required for the interaction with RTN4.**

Full-length TMEM170A (lane 2) and two TMEM170A mutants were fused with a GFP tag at their C-terminus. One of the mutants was missing the first 49 N-terminal amino acids (TMEM170Am\_50-144) (lane 4) and the second was missing the last C-terminal seven amino acids (TMEM170Am\_1-137) (lane 3). “Input” corresponds to 1/40 volume of the lysate used for the reaction and “IP” is 1/2 of the bound fraction (i.e. protein complexes captured on the beads).



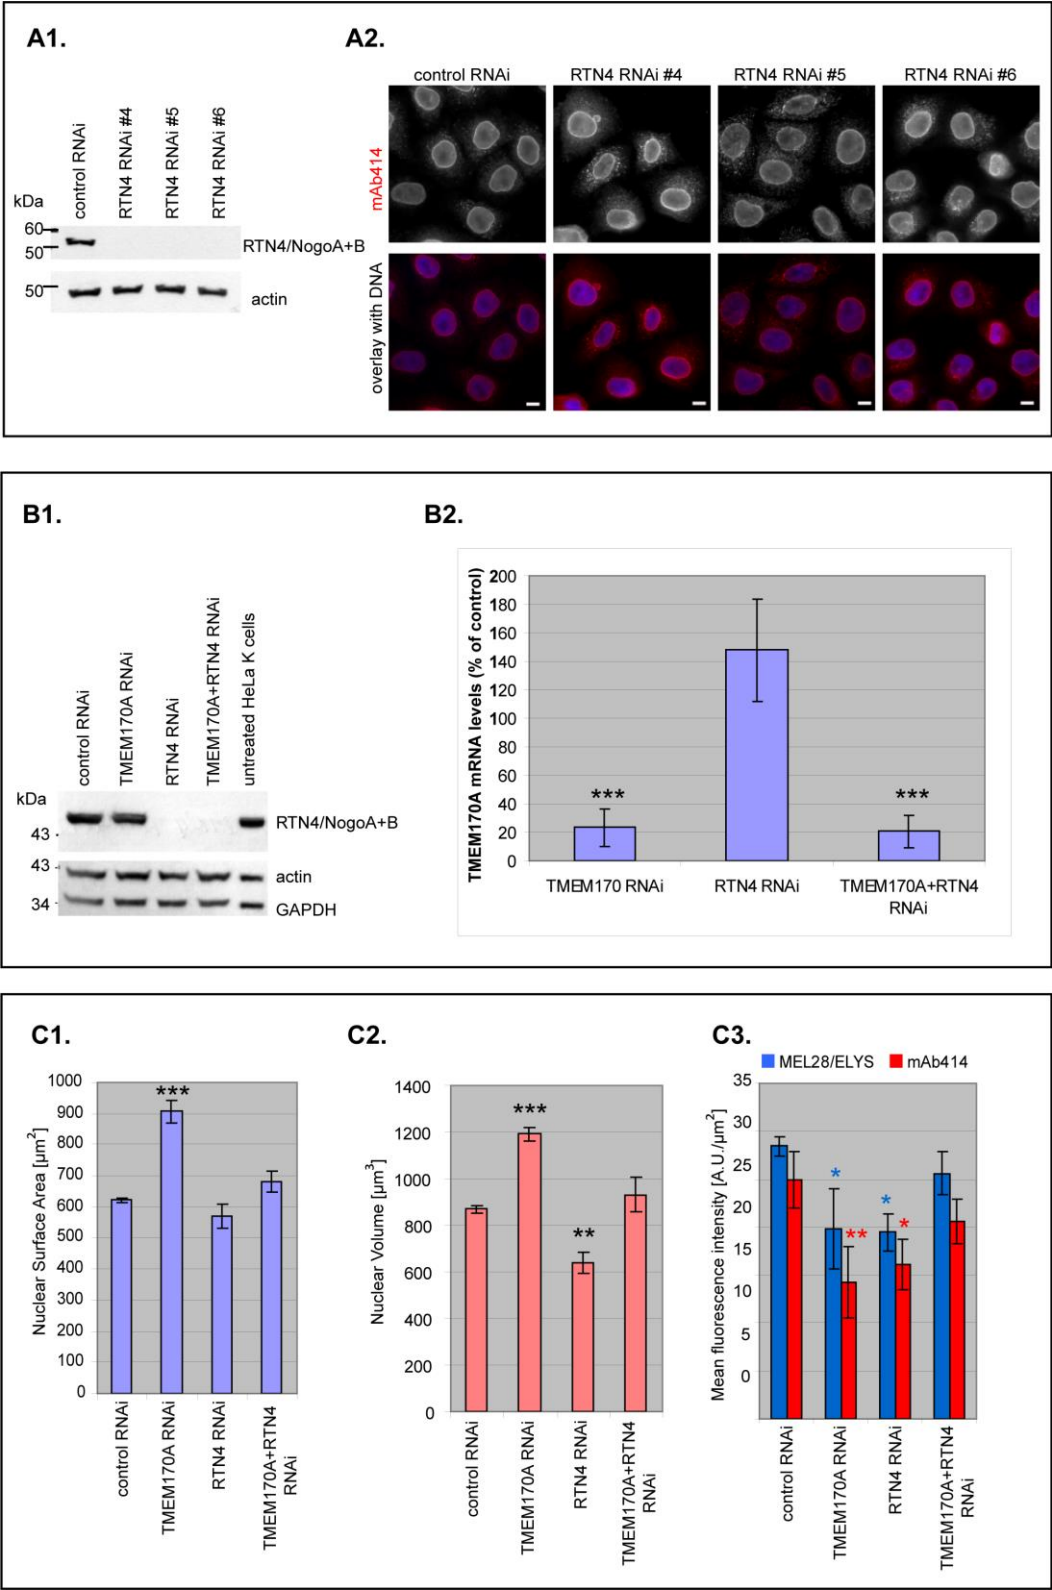

**Fig. S4. Establishing conditions for RTN4 and double TMEM170A+RTN4 silencing.**

(A1) Efficiency of RTN4 silencing by Western blot. Three siRNA oligos for RTN4 were tested (Table S3).

**(A2)** RTN4-silenced cells, stained with mAb414 (red), showed reduced nuclear rim signal and mis-localization to the cytoplasm, relative to control cells. Oligo set #5 gave the strongest phenotype and was employed for further analysis. Nuclei are counterstained with Hoechst (blue). Scale bars: 10  $\mu$ m.

**(B1)** Efficiency of RTN4 silencing by Western blot in single TMEM170A or RTN4 and TMEM170A plus RTN4 co-silencing.

**(B2)** Quantitative real-time RT-PCR was used to measure mRNA levels of TMEM170A in single TMEM170A or RTN4 or double TMEM170A plus RTN4 silencing experiments. In single TMEM170A silencing, TMEM170A mRNA was reduced to  $23.45 \pm 13\%$  (S.D.) of control-silenced levels. In single RTN4 silencing, TMEM170A mRNA is not affected [ $(147.82 \pm 36)\%$  (S.D.) of control-silenced levels]. Finally, in double TMEM170A plus RTN4 silencing, TMEM170A mRNA was reduced to  $20.46 \pm 11\%$  (S.D.) of control-silenced levels. mRNA levels of the *MGB2* housekeeping gene were used for sample normalization. N=3 independent experiments. The \*\*\* indicate that the difference is extremely significant ( $P < 0.001$ ).

**Double TMEM170A plus RTN4 silencing restores nuclear size and NPC density, affected either by single TMEM170A or RTN4 silencing in HeLa K cells**

**(C1)** Quantitation of nuclear surface area of HeLa K transfected with control or TMEM170A or RTN4 and TMEM170A + RTN4 co-silencing. Shown is the average of three independent experiments,  $n > 52$  cells (for each condition per experiment). Error bars show S.D. The \*\*\* indicate that the difference is extremely significant ( $P < 0.001$ ).

**(C2)** Quantitation of nuclear volume of HeLa K transfected with control or TMEM170A or RTN4 and TMEM170A + RTN4 co-silencing. Shown is the average of three independent experiments,  $n > 52$  cells (for each condition per experiment). Error bars show S.D. \*\*\* and \*\* indicate that the difference is extremely significant ( $P < 0.001$ ) and very significant ( $P < 0.01$ ), respectively.

**(C3)** Quantitation of mean immunofluorescence MEL28/ELYS and mAb414 intensity to estimate NPC density in HeLa K cells transfected with control or TMEM170A or RTN4 and TMEM170A + RTN4 co-silencing.  $n > 52$  nuclei per condition from three independent experiments. Error bars show S.D. \*\* and \* indicate that the difference is very significant ( $P < 0.01$ ) and significant ( $P < 0.05$ ), respectively.

## SUPPLEMENTARY VIDEOS

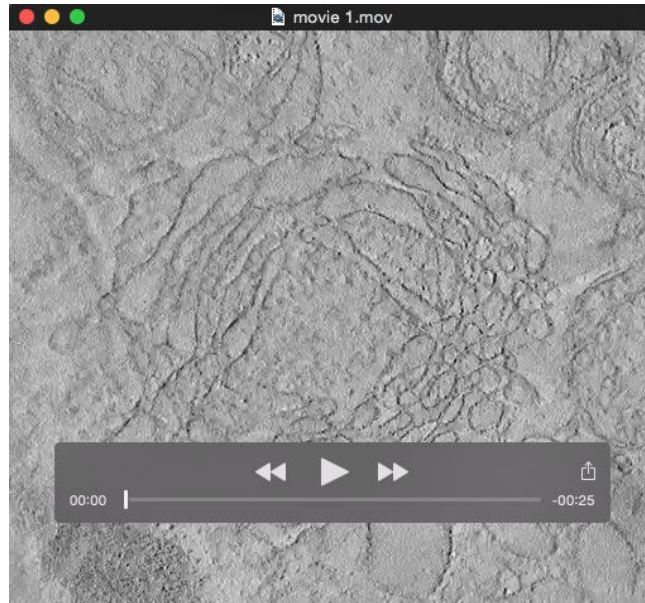

### **Movie 1: 3D electron tomography in TMEM170A-silenced HeLa K cells.**

TMEM170A silencing-induced structures that appear to be, at first glance, well-organized structure of smooth ER; however, 3D scanning through the movie demonstrates that the tubules are mostly still separated into small sections rather than joined up into cisternal stacks.



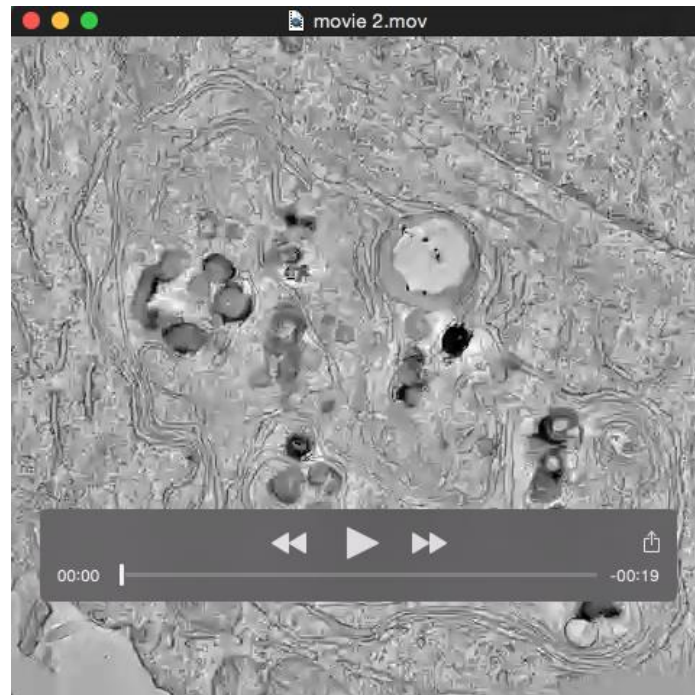

**Movie 2: 3D electron tomography in FLAG-TMEM170A overexpressing cells HeLa K cells.**

Overexpression of FLAG-TMEM170A induced well-organized and extensive ER sheet stacks.

**Table S1. List of proteins that co-immunoprecipitated with TMEM170A (Fig. 7; bands 1-3) as identified by mass spectrometric analysis.**

| Band | Accession No. | Protein Name                    |
|------|---------------|---------------------------------|
| 1    | FAS_HUMAN     | Fatty acid synthase             |
|      | GCN1L_HUMAN   | Translational activator GCN1    |
| 2    | RTN4_HUMAN    | Reticulon-4                     |
| 3    | RAN_HUMAN     | GTP-binding nuclear protein Ran |

**Table S2. List of oligonucleotides used for cloning and quantitative RT-PCR**

| Set | Forward primer 5' → 3'                | Reverse primer 5' → 3'               |
|-----|---------------------------------------|--------------------------------------|
| 1   | TGTGCCCCAACTCTACTTCC                  | AGTGCCCACAGGAATACACC                 |
| 2   | AGC GTA CTC CAA AGA TTC AGG TT        | TAC ATG TCT CGA TCC CAC TTA ACT AT   |
| 3   | CGCTCGAGATGGAGCGCGAGGGGAGCGGCGGCA     | CGGAATTCGTAGAGTAGCTAAAATCCGTAAAAAGG  |
| 4   | CGGAATTCATGGAGCGCGAGGGGAGCGGCGGCA     | GCGCTCGAGGTAGAGTAGCTAAAATCCGTAAAAAGG |
| 5   | CGCGCTCGAGTTCCTGTGGGCACTGGTGTCTTCTCTC | CGGAATTCGTAGAGTAGCTAAAATCCGTAAAAAGG  |
| 6   | CGCGCTCGAGATGGAGCGCGAGGGGAGCGGCGGCA   | CGGAATTCGAAAGGAGACCACCAAGACGCA       |

**Table S3. A list of siRNA oligonucleotides used.**

| Set | Company | Name                                      | Sequence (5' → 3')  |
|-----|---------|-------------------------------------------|---------------------|
| 1   | MWG     | Luciferase siRNAs –Negative control oligo | UCGAAGUAUCCGCGUACG  |
| 2   | Ambion  | TMEM170A (141393)                         | GGACAACACAUCUCAGCCU |
| 3   | Ambion  | TMEM170A (38236)                          | GGAACAUGAAGGACAACAC |
| 4   | Ambion  | RTN4 (6828)                               | GGGCAUAUCUGGAAUCUGA |
| 5   | Ambion  | RTN4 (289847)                             | CCAUCAGCUUUAGGAUAUA |
| 6   | Ambion  | RTN4 (6738)                               | GGGUGUGAUCCAAGCUAUC |

Highlighted in blue are the ones mainly used for this work.

**TABLE S4. Primary and secondary antibodies used in this work**

| PRIMARY ANTIBODIES (TO)        | SOURCE/REFERENCE                     | WORKING DILUTION |
|--------------------------------|--------------------------------------|------------------|
| mAb414 mouse mab               | Covance, MMS-120P                    | 1:1000 (IF&WB)   |
| Pom121 rabbit ab               | Yavuz et al., 2010                   | 1:20 (IF)        |
| MEL28/ELYS rabbit ab           | Franz et al., 2007                   | 1:2000 (IF&WB)   |
| RTN4/NogoA+B rabbit ab         | Abcam, ab47085                       | 1:300 (IF&WB)    |
| LBR (E398L) rabbit mab         | Abcam, ab32535                       | 1:300 (IF&WB)    |
| LAP2 $\beta$ mouse ab          | BD Transduction Laboratories, 611000 | 1:500 (IF&WB)    |
| emerin rabbit ab               | Abcam ab14208                        | 1:300 (IF&WB)    |
| calnexin (H-70) rabbit ab      | Santa Cruz, sc-11397                 | 1:100 (IF&WB)    |
| calreticulin (H-170) rabbit ab | Santa Cruz, sc-11398                 | 1:50 (IF)        |
| FLAG mouse mab                 | Sigma-Aldrich, F4042                 | 1:500 (IF)       |
| lamin A (133A2) mouse mab      | Abcam ab8980                         | 1:500 (IF)       |
| LEM4 rabbit ab                 | Asencio et al., 2012                 | 1:100 (IF)       |
| CLIMP-63 (G1/296) mouse mab    | Enzo, ALX-804-604-C100               | 1:1000 (IF&WB)   |
| Nup160 rabbit ab               | Abcam, ab74147                       | 1:500 (WB)       |
| GFP rabbit ab                  | Yavuz et al., 2010                   | 1:1000 (IF)      |
| GFP mouse ab                   | Roche, 11814460001                   | 1:1000 (WB)      |
| Actin (AC-74) mouse mab        | Sigma-Aldrich, A2228                 | 1:10000 (WB)     |
| GAPDH (6C5) mouse mab          | Santa Cruz sc-32233                  | 1:500 (WB)       |
| SECONDARY ANTIBODIES           | SOURCE                               | WORKING DILUTION |
| AF350 goat anti-mouse IgG      | Molecular Probes A11045              | 1:100 (IF)       |
| AF488 goat anti-mouse IgG      | Molecular Probes A11017              | 1:1500 (IF)      |
| AF488 goat anti-rabbit IgG     | Molecular Probes A11034              | 1:1500 (IF)      |
| AF488 donkey anti-mouse IgG    | Molecular Probes A21202              | 1:1000 (IF)      |
| AF488 donkey anti-rabbit IgG   | Molecular Probes A21206              | 1:1000 (IF)      |
| AF568 goat anti-mouse IgG1     | Molecular Probes A21124              | 1:1500 (IF)      |
| AF568 goat anti-rabbit IgG     | Molecular Probes A11036              | 1:1500 (IF)      |
| AF555 donkey anti-rabbit IgG   | Molecular Probes A31572              | 1:1000 (IF)      |
| AF555 donkey anti-mouse IgG    | Molecular Probes A31570              | 1:1000 (IF)      |
| HRP donkey anti-rabbit IgG     | Santa Cruz sc-2077                   | 1:20,000 (WB)    |
| HRP sheep anti-mouse IgG       | GE Healthcare NA931                  | 1:8000 (WB)      |

DNA was counter stained with 0.5  $\mu$ g/ml Hoechst 33342.

## REFERENCES

- Asencio, C., Davidson, I. F., Santarella-Mellwig, R., Ly-Hartig, T. B. N., Mall, M., Wallenfang, M. R., Mattaj, I. W. and Gorjánácz, M. (2012).** Coordination of kinase and phosphatase activities by Lem4 enables nuclear envelope reassembly during mitosis. *Cell* **150**, 122-135.
- Franz, C., Walczak, R., Yavuz, S., Santarella, R., Gentzel, M., Askjaer, P., Galy, V., Hetzer, M., Mattaj, I. W. and Antonin, W. (2007).** MEL-28/ELYS is required for the recruitment of nucleoporins to chromatin and postmitotic nuclear pore complex assembly. *EMBO Rep* **8**, 165-172.
- Yavuz, S., Santarella-Mellwig, R., Koch, B., Jaedicke, A., Mattaj, I. W. and Antonin, W. (2010).** NLS-mediated NPC functions of the nucleoporin Pom121. *FEBS Lett* **584**, 3292-3298.
